# Supplementary material for: Identifying low-risk patients with acute respiratory tract infections for telehealth triage: A retrospective analysis
Source: Research Square preprint supplement (doi:10.21203/rs.3.rs-6222383/v1), 2026-02-22
Supplement: Supplementary file 1 [file 668257e932657a24fc86c5eb.docx]

| **Variable** | **Development** | **Validation** | **Validation** |
| --- | --- | --- | --- |
| **Site A n=81,131** | **Site B n = 11,544** | **Site C n=34,435** |
| **Charlson Comorbidities** |  |  |  |
| AIDS | 98 (0.12) | 311 (2.69) | 112 (0.33) |
| Congestive Heart Failure | 3574 (4.41) | 365 (3.16) | 216 (0.63) |
| Connective tissue disease | 2678 (3.3) | 210 (1.82) | 84 (0.24) |
| Chronic Obstructive Pulmonary Disease | 18172 (22.4) | 2207 (19.12) | 2886 (8.38) |
| Cardiovascular Disease | 3490 (4.3) | 390 (3.38) | 59 (0.17) |
| Dementia | 853 (1.05) | 42 (0.36) | 29 (0.08) |
| Diabetes uncomplicated | 8301 (10.23) | 1375 (11.91) | 569 (1.65) |
| Diabetes complicated | 3745 (4.62) | 678 (5.87) | 254 (0.74) |
| Hemiplegia | 206 (0.25) | 44 (0.38) | 5 (0.01) |
| Liver disease | 3414 (4.21) | 759 (6.57) | 111 (0.32) |
| Malignant tumor | 6526 (8.04) | 580 (5.02) | 229 (0.67) |
| Metastatic cancer | 709 (0.87) | 16 (0.14) | 11 (0.03) |
| Myocardial Infarction | 1731 (2.13) | 121 (1.05) | 180 (0.52) |
| Peptic ulcer disease | 624 (0.77) | 88 (0.76) | 8 (0.02) |
| Peripheral vascular disease | 2764 (3.41) | 323 (2.8) | 43 (0.12) |
| Renal disease | 4255 (5.24) | 577 (5) | 231 (0.67) |
| Severe liver disease* | 81 (0.1) | 22 (0.19) | N/A |
| **Elixhauser Comorbidities** |  |  |  |
| AIDS | 98 (0.12) | 314 (2.72) | 112 (0.33) |
| Alcohol abuse | 117 (0.14) | 542 (4.7) | 10 (0.03) |
| Blood loss anemia | 1304 (1.61) | 112 (0.97) | 10 (0.03) |
| Cardiac arrhythmias | 10443 (12.87) | 763 (6.61) | 464 (1.35) |
| Congestive Heart Failure | 3574 (4.41) | 373 (3.23) | 216 (0.63) |
| Coagulopathy | 2432 (3) | 207 (1.79) | 46 (0.13) |
| Connective tissue disease | 3925 (4.84) | 264 (2.29) | 95 (0.28) |
| Chronic Obstructive Pulmonary Disease | 18172 (22.4) | 2420 (20.96) | 2886 (8.38) |
| Deficiency anemia | 4537 (5.59) | 706 (6.12) | 109 (0.32) |
| Depression | 9217 (11.36) | 3343 (28.96) | 334 (0.97) |
| Diabetes complicated | 5397 (6.65) | 821 (7.11) | 628 (1.82) |
| Diabetes uncomplicated | 8089 (9.97) | 1095 (9.49) | 520 (1.51) |
| Drug abuse | 1886 (2.32) | 845 (7.32) | 79 (0.23) |
| Fluid and electrolytes disorders | 6797 (8.38) | 308 (2.67) | 189 (0.55) |
| Hypertension complicated | 2827 (3.48) | 67 (0.58) | 136 (0.39) |
| Hypertension uncomplicated | 27628 (34.05) | 3896 (33.75) | 2021 (5.87) |
| Hypothyroidism | 10180 (12.55) | 700 (6.06) | 337 (0.98) |
| Liver disease | 3775 (4.65) | 736 (6.38) | 134 (0.39) |
| Lymphoma | 473 (0.58) | 71 (0.62) | 23 (0.07) |
| Metastatic cancer | 709 (0.87) | 16 (0.14) | 9 (0.03) |
| Obesity† | 16734 (20.63) | 3469 (30.05) | N/A |
| Other neurological disorders | 2303 (2.84) | 322 (2.79) | 96 (0.28) |
| Paralysis | 206 (0.25) | 37 (0.32) | 6 (0.02) |
| Peptic ulcer disease | 508 (0.63) | 78 (0.68) | 6 (0.02) |
| Psychoses | 569 (0.7) | 159 (1.38) | 28 (0.08) |
| Pulmonary circulatory disorders | 1491 (1.84) | 164 (1.42) | 43 (0.12) |
| Peripheral vascular disease | 2764 (3.41) | 268 (2.32) | 33 (0.10 |
| Renal failure | 4249 (5.24) | 553 (4.79) | 234 (0.68) |
| Solid tumor | 5802 (7.15) | 506 (4.38) | 165 (0.48) |
| Valvular disease | 3244 (4) | 219 (1.9) | 66 (0.19) |
| Weight loss | 3588 (4.42) | 390 (3.38) | 79 (0.23) |

* Charlson comorbidities severe liver disease data unavailable for site C.

†Elixhauser comorbidity data on obesity unavailable or site C.
