# Supplementary material for: Identifying low-risk patients with acute respiratory tract infections for telehealth triage: A retrospective analysis
Source: Research Square preprint supplement (doi:10.21203/rs.3.rs-6222383/v1), 2026-02-22
Supplement: Supplementary file 2 [file b3cc81faadb52a39eae92a9c.docx]

| **Monoclonal** |
| --- |
| Rituximab |
| Infliximab |
| Adalimumab |
| Etanercept |
| Tocilizumab |
| Natalizumab |
| Trastuzumab |
| Vedolizumab |
| Golimumab |
| Certolizumab |
| Anakinra |
| Tacrolimus |
| Mycophenolate |
| Sirolimus |
| Cyclosporine |
