# Supplementary material for: Identifying low-risk patients with acute respiratory tract infections for telehealth triage: A retrospective analysis
Source: Research Square preprint supplement (doi:10.21203/rs.3.rs-6222383/v1), 2026-02-22
Supplement: Supplementary file 3 [file db94e1401d5ff7661c225267.docx]

| **Variable** | **OR (95% CI)** | **SE** | **p value** |
| --- | --- | --- | --- |
| Heart Disease | 1.96(1.68,2.30) | 0.0809 | <.0001 |
| Diabetes | 0.57(0.45,0.71) | 0.1173 | <.0001 |
| Cancer | 1.38(1.15,1.65) | 0.0913 | < 0.001 |
| COPD | 1.39(1.20,1.61) | 0.0744 | <.0001 |
| Insulin | 9.13(7.02,11.87) | 0.1341 | <.0001 |
| Prior Antibiotic Use | 1.37(1.14,1.65) | 0.0931 | < 0.001 |
| Prior Visit in Past 30 Days | 1.40(1.16,1.69) | 0.0955 | < 0.001 |
| Age | 1.03(1.02,1.04) | 0.00240 | <.0001 |
