# Supplementary material for: Identifying low-risk patients with acute respiratory tract infections for telehealth triage: A retrospective analysis
Source: Research Square preprint supplement (doi:10.21203/rs.3.rs-6222383/v1), 2026-02-22
Supplement: Supplementary file 4 [file e43062152b592d70d77e1d74.docx]

| **Lower and upper respiratory tract infections** | **ICD10 code** |
| --- | --- |
| **Acute viral URTI** |  |
| Common Cold | J00 |
| Other acute upper respiratory infections of multiple sites | J06.8 |
| Acute upper respiratory infection (unspecified) | J06.9 |
| Other diseases of upper respiratory tract | J39.X |
| **Acute sinusitis** | J01.XX |
| **Acute pharyngitis** |  |
| Non-streptococcus | J02.8-J02.9, J03.0-J03.9, J04.0-J04.9,J06.0 |
| Streptococcus | J02.0 |
| **Influenza** | J09.XX, J10.XX, J11.XX |
| **Pneumonia** |  |
| Viral | J12.X |
| Unspecified acute lower RTIs | J22 |
| Bacterial | J13,J14, J15.XX, J16.X, J17, J18.X |
| **Acute bronchitis** | J20.X, J40 |
| **Acute bronchiolitis** | J21.X |
| Croup | J05.X |
